# Supplementary material for: Water-dispersible Ti3C2Tz MXene nanosheets by molten salt etching
Source: PubMed Central journal article supplement — iScience. 2021 Nov 7;24(12):103403. doi: 10.1016/j.isci.2021.103403 (PMC8607195; doi:10.1016/j.isci.2021.103403), 2021-11-07
Supplement: mmc1.pdf [file mmc1.pdf]

**iScience, Volume 24**

**Supplemental information**

**Water-dispersible Ti<sub>3</sub>C<sub>2</sub>T<sub>z</sub> MXene  
nanosheets by molten salt etching**

**Kailash Arole, Jackson W. Blivin, Sanjit Saha, Dustin E. Holta, Xiaofei Zhao, Anubhav Sarmah, Huaixuan Cao, Miladin Radovic, Jodie L. Lutkenhaus, and Micah J. Green**

# Water-dispersible $Ti_3C_2T_z$ MXene Nanosheets by Molten Salt Etching

Kailash Arole<sup>1</sup>, Jackson W. Bilvin<sup>2</sup>, Sanjit Saha<sup>2</sup>, Dustin E. Holta<sup>1</sup>, Xiaofei Zhao<sup>2</sup>, Anubhav Sarmah<sup>2</sup>, Huaixuan Cao<sup>2</sup>, Miladin Radovic<sup>1</sup>, Jodie L. Lutkenhaus<sup>1,2</sup>, Micah J. Green<sup>1,2\*</sup>

<sup>1</sup>Department of Materials Science and Engineering, Texas A&M University, College Station, TX 77843, USA

<sup>2</sup>Artie McFerrin Department of Chemical Engineering, Texas A&M University, College Station, TX 77843, USA

\*Corresponding author: [micah.green@tamu.edu](mailto:micah.green@tamu.edu)

---

## Supplementary Information

**Fig. S1.**  $Ti_3C_2T_z$  processing schematic

**Fig. S2.** EDS mapping of  $Ti_3C_2T_z$  clay a) before KOH washing b) after KOH washing

**Table S1.** EDS data which shows the elemental composition of the  $Ti_3C_2T_z$  clay before and after KOH washing

**Fig. S3** Stable aqueous dispersion of  $Ti_3C_2T_z$  nanosheets with negative  $\zeta$  potential

**Fig. S4.** Two-Stage centrifugation method schematic

**Fig. S5.** Additional SEM images of  $Ti_3C_2T_z$  nanosheets

**Fig. S6.** AFM image of  $Ti_3C_2T_z$  nanosheet and corresponding height profile

**Fig. S7.** UV–Vis absorption spectra of  $Ti_3C_2T_z$  dispersion

**Data S1.**  $Ti_3C_2T_z$  MXene formation mechanism

**Fig. S8.** RF response heating profile and Thermal Images of RF response of  $Ti_3C_2T_z$

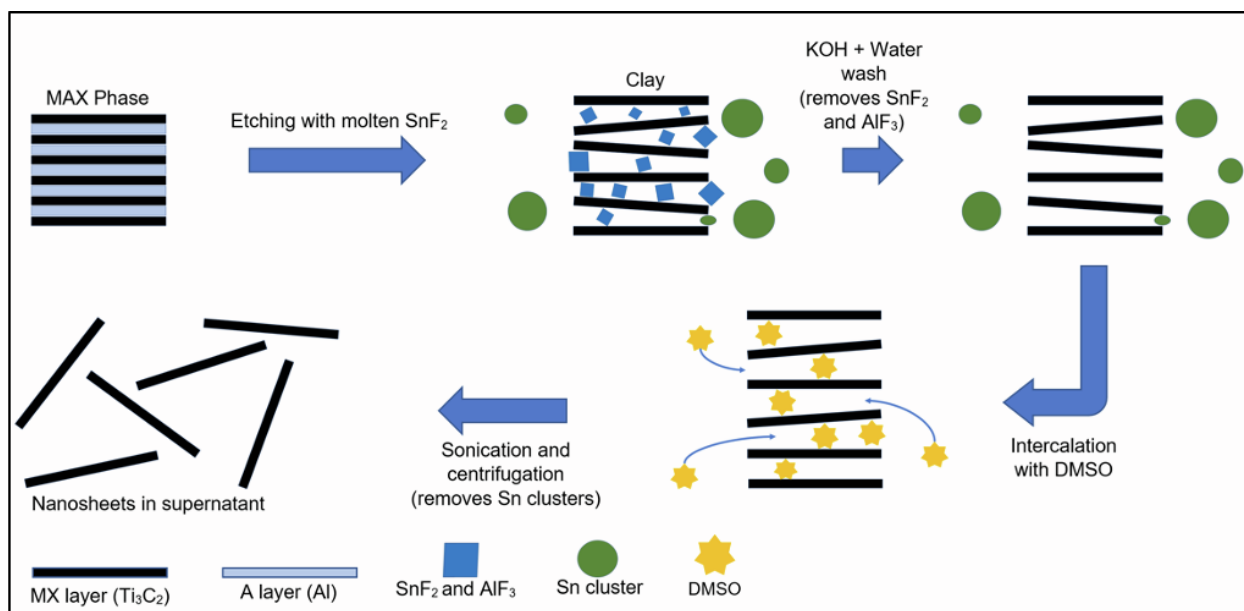

**Fig. S1.**  $Ti_3C_2T_x$  processing schematic, which clearly shows every step need to be followed to get  $Ti_3C_2T_x$  dispersion. Related to STAR Methods.

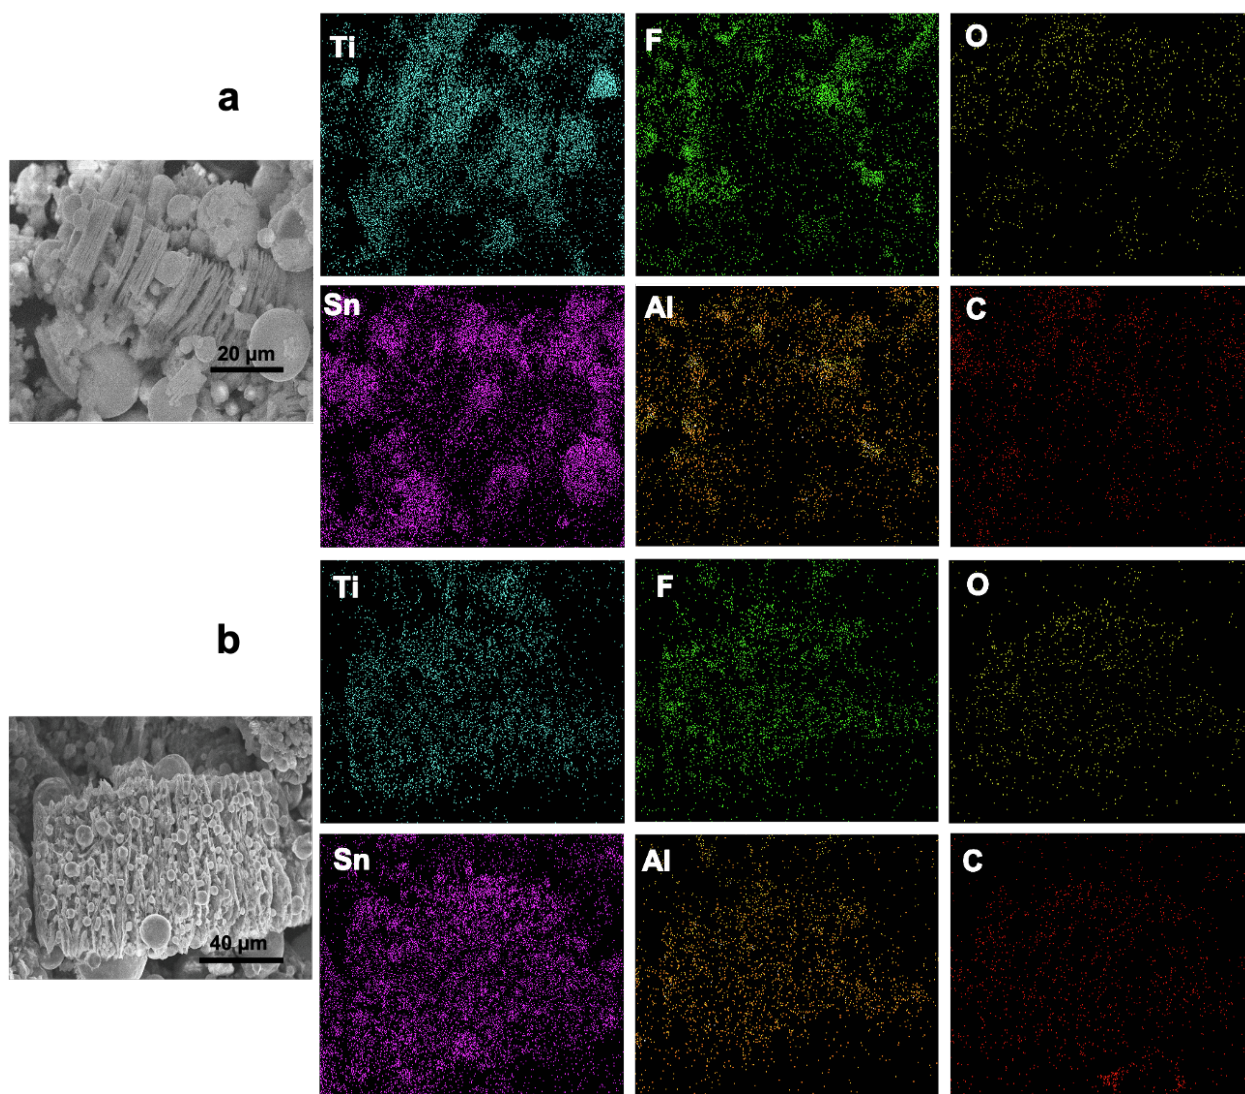

**Fig. S2.** EDS mapping of  $Ti_3C_2T_x$  clay a) before KOH washing b) after KOH washing. Related to figure 2.

**Table S1.** EDS data which shows the elemental composition of the  $Ti_3C_2T_z$  clay before and after KOH washing corresponding to Fig. S2. The highlighted red shows the reduced percentage of aluminum compared to MAX phases which indicated the successful etching. Related to figure 2.

| <b>MXene</b> | <b>Before KOH wash</b> | <b>After KOH wash</b> |
|--------------|------------------------|-----------------------|
| Element      | % Weight               | % Weight              |
| C            | 8.25                   | 9.24                  |
| O            | 6.64                   | 11.00                 |
| F            | 37.43                  | 33.43                 |
| Al           | 2.90                   | 2.86                  |
| Ti           | 11.97                  | 8.02                  |
| Sn           | 31.97                  | 35.19                 |

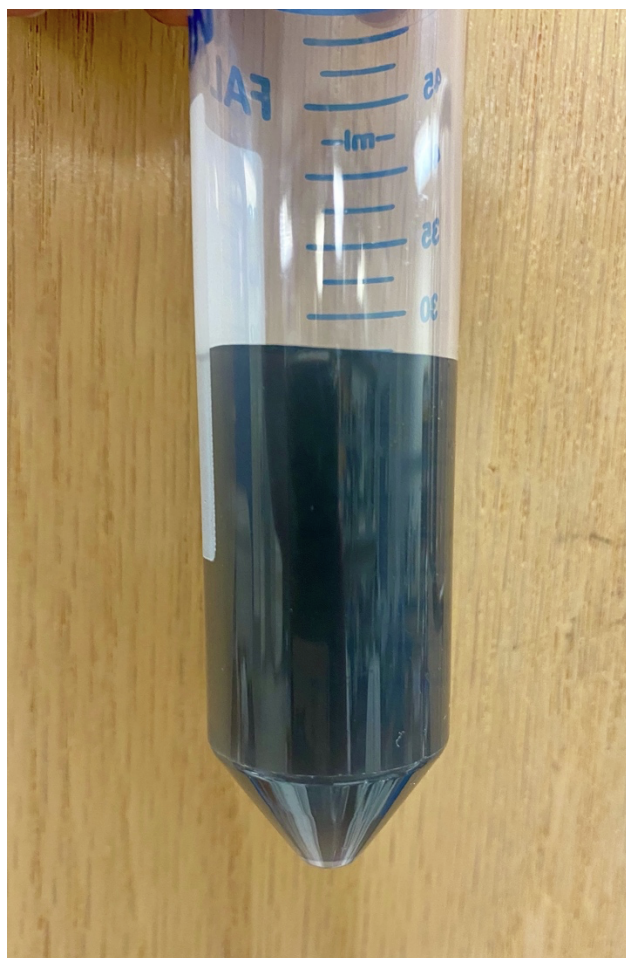

**Fig. S3.** Stable aqueous dispersion of  $\text{Ti}_3\text{C}_2\text{T}_z$  nanosheets with negative  $\zeta$  potential. Related to figure 3.

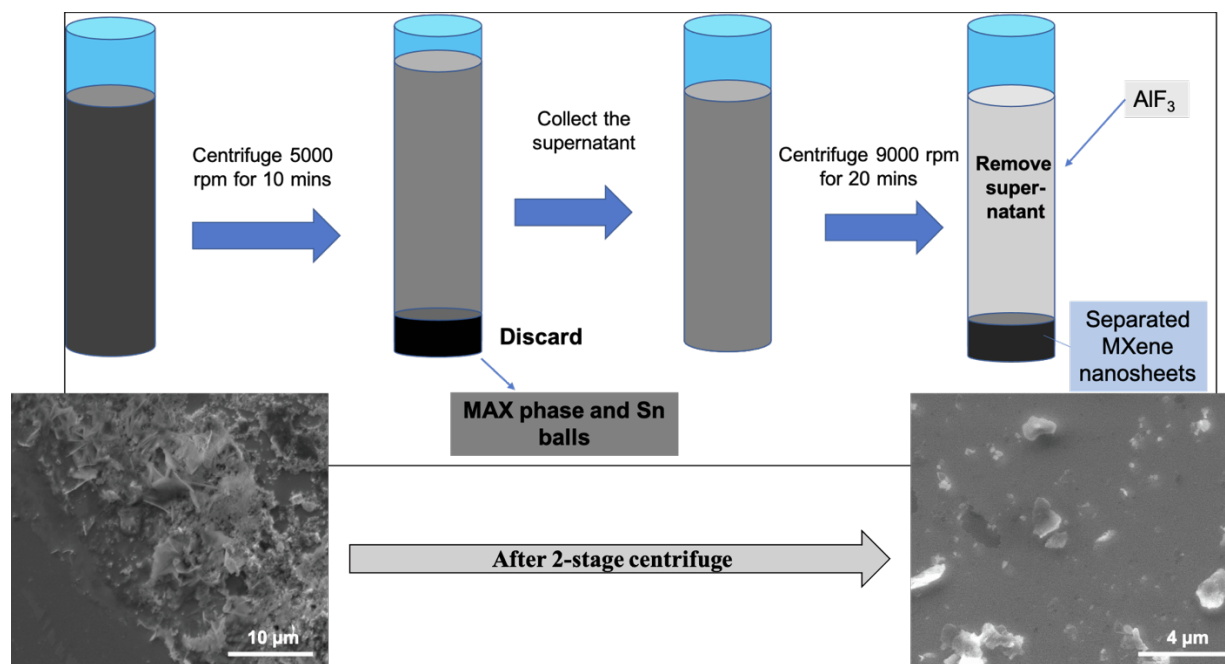

**Fig. S4.** Two-Stage centrifugation method used for the separation of  $Ti_3C_2T_z$  from the Sn Spheres. This method helped to get rid of heavy MAX phase particles and other small unwanted particles from the supernatant. The original dispersion (SEM, left) has considerable  $Ti_3AlC_2$  MAX phase, Sn spheres, etc. present, whereas the final product (SEM, right) is composed of  $Ti_3C_2$  nanosheets. Related to STAR Method.

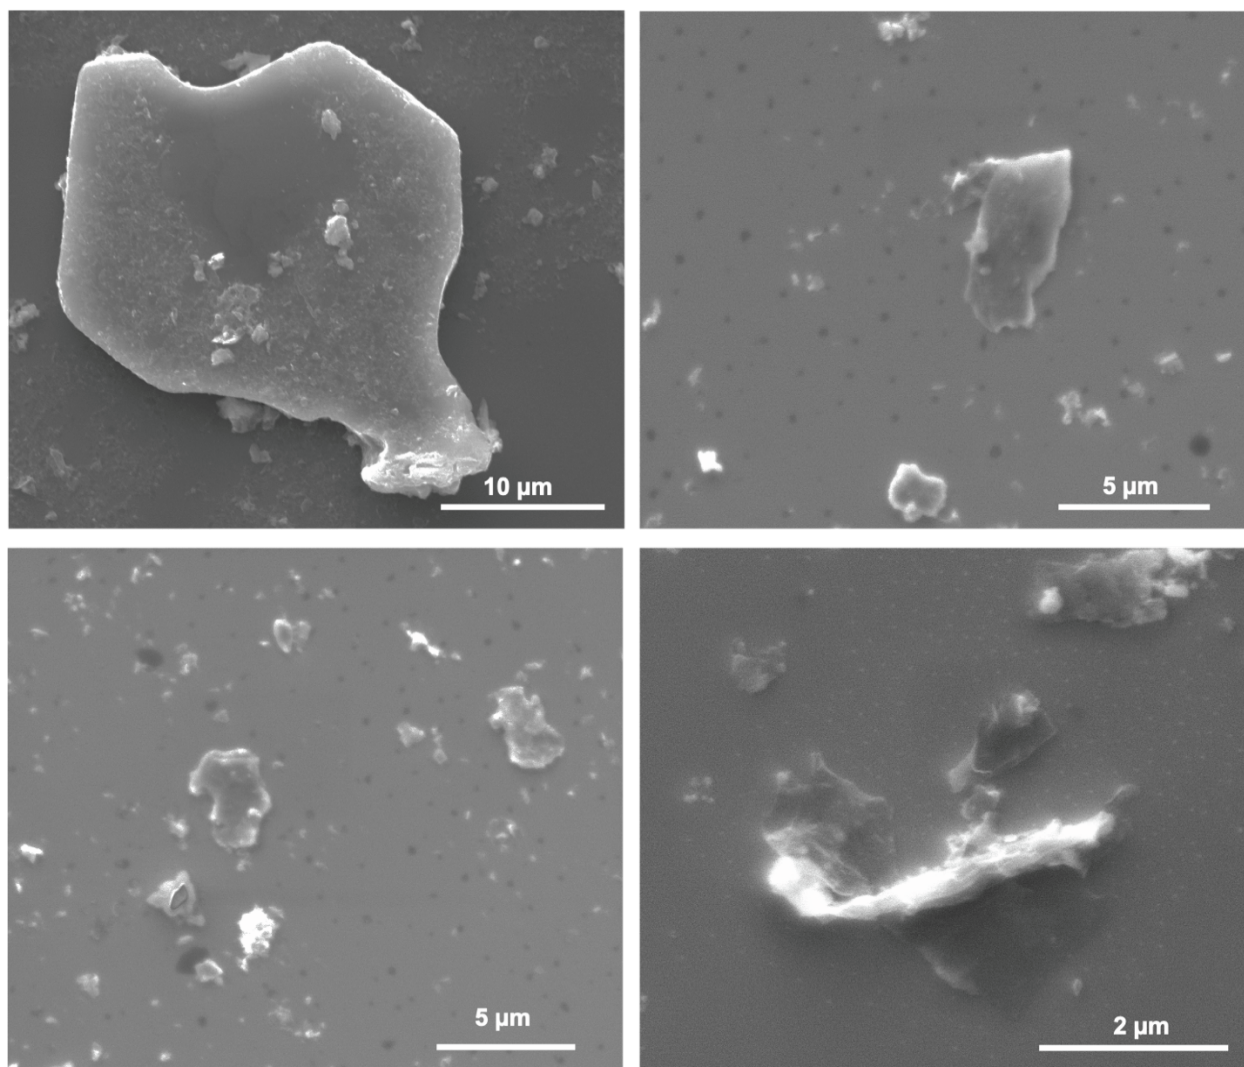

**Fig. S5.** Additional SEM images of  $\text{Ti}_3\text{C}_2\text{T}_z$  nanosheets, which confirms the formation of single layer MXene nanosheets. Related to figure 2.



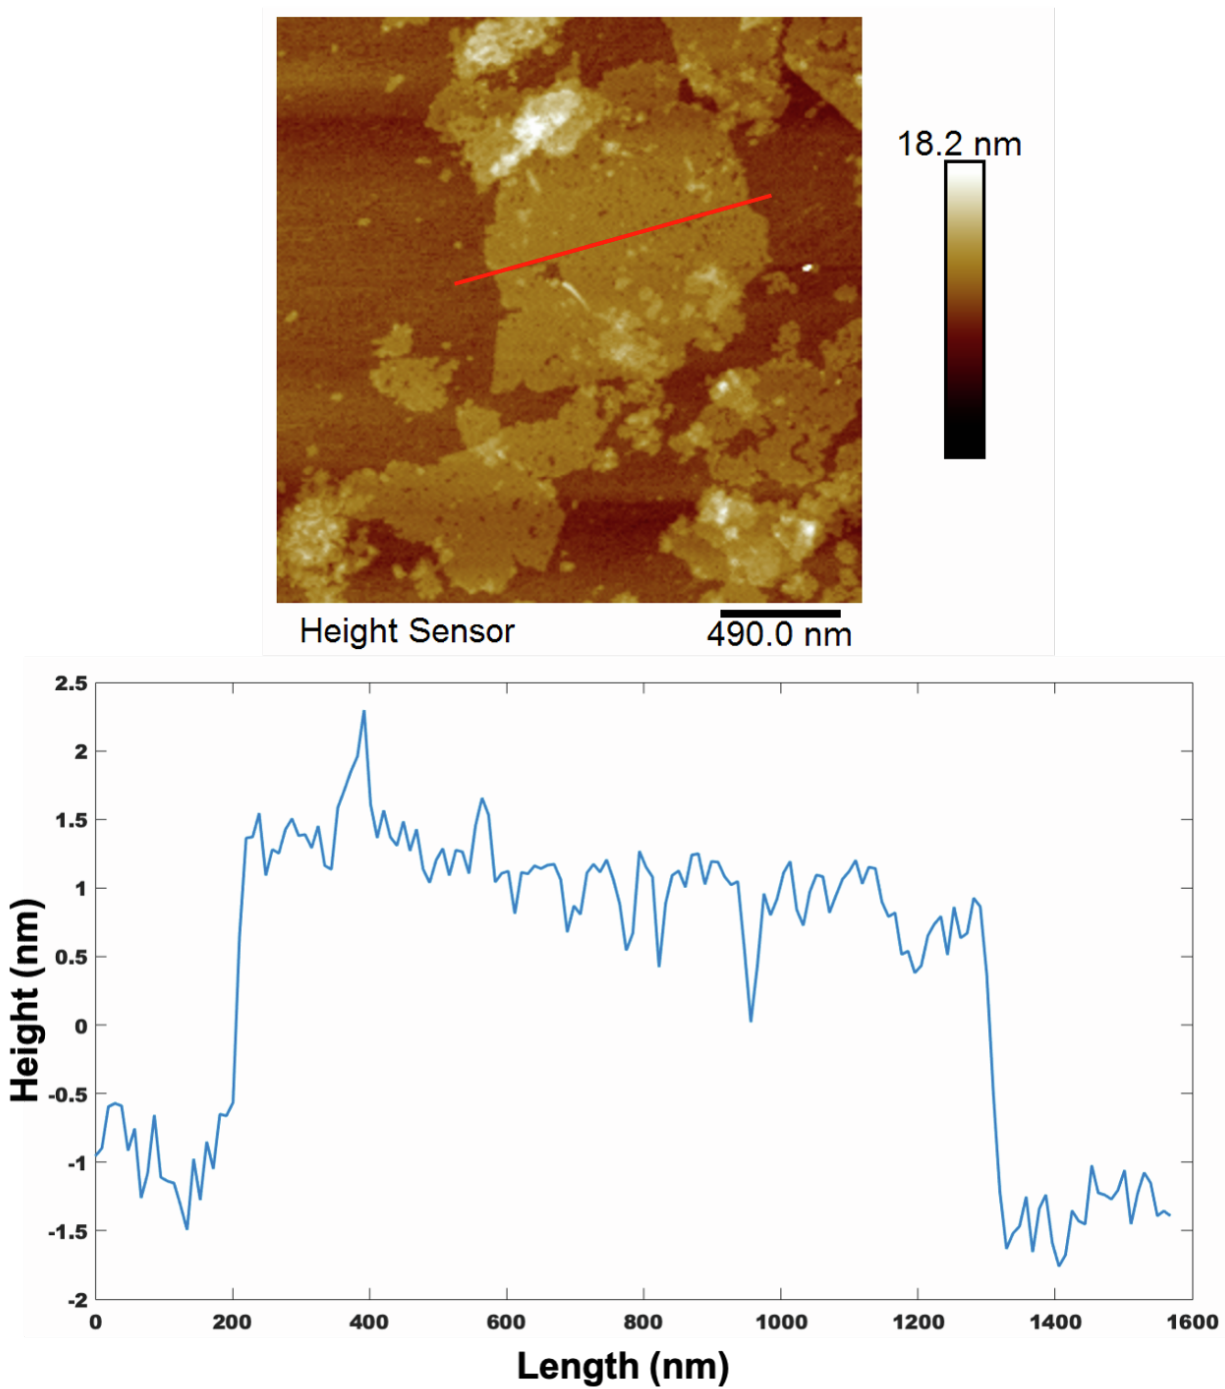

**Fig. S6.** AFM image of  $\text{Ti}_3\text{C}_2\text{T}_z$  nanosheet and corresponding height profile.  $\text{Ti}_3\text{C}_2\text{T}_z$  dispersion was again diluted with water and drop-cast on freshly cleaved mica substrate. The concentration of sample used for AFM was 0.006 mg/ml. Related to figure 6.

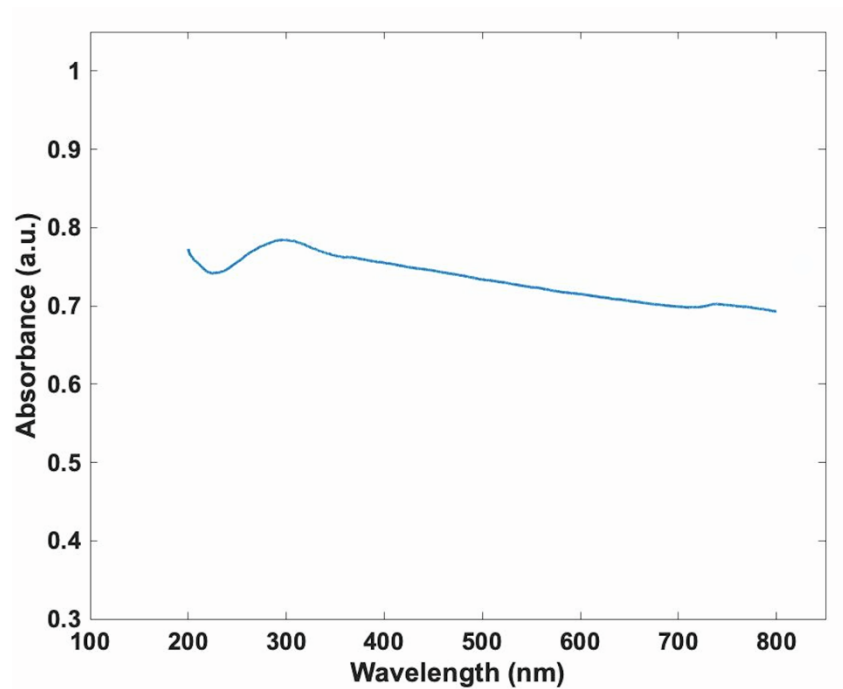

**Fig. S7.** UV–Vis absorption spectra of  $\text{Ti}_3\text{C}_2\text{T}_z$  dispersion (0.4 mg/ml), which clearly resembles with the acid etched  $\text{Ti}_3\text{C}_2\text{T}_z$  dispersion. Related to STAR Methods.

## Data S1. $\text{Ti}_3\text{C}_2\text{T}_z$ MXene Formation Mechanism. Related to figure 1.

The formation of F-terminated  $\text{Ti}_3\text{C}_2\text{T}_z$  is a two-step process as reported by Mian *et al.* (Li *et al.*, 2019), which we recapitulate here. **Step 1** involves the replacement of Al in  $\text{Ti}_3\text{AlC}_2$  by Sn that results in the formation  $\text{Ti}_3\text{SnC}_2$ , which is an intermediate product in the formation of  $\text{Ti}_3\text{C}_2\text{T}_z$  along with  $\text{AlF}_3$  as a byproduct is generated. Also, as the reaction proceeds,  $\text{Sn}^{2+}$  ions form, which will intercalate into A site after removal of Al from  $\text{Ti}_3\text{AlC}_2$ .

### Step 1

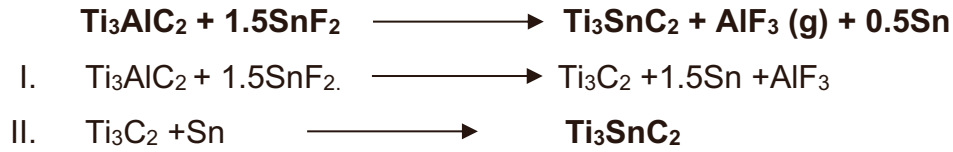

The formation of F-terminated  $\text{Ti}_3\text{C}_2\text{T}_z$  depends on the ratio of the Al-MAX phase to  $\text{SnF}_2$ . The ratio of the Al-MAX phase to  $\text{SnF}_2$  used in this study is 1:6. The exact mechanism behind the formation of  $\text{Ti}_3\text{C}_2\text{T}_z$  was not clearly stated in the study by Mian *et al.* (Li *et al.*, 2019).

The formation of F-terminated  $\text{Ti}_3\text{C}_2\text{T}_z$  from an intermediate product  $\text{Ti}_3\text{SnC}_2$  is represented in **Step 2**, which is further subdivided into three steps. Previous research indicated that the redox reaction between Sn and  $\text{Sn}^{2+}$  results in the dissolution of Sn into a molten  $\text{SnF}_2$ . The weakly bonded Sn atoms in  $\text{Ti}_3\text{SnC}_2$  were easily removed from the A-site and dissolved into a molten salt  $\text{SnF}_2$ . The  $\text{F}^-$  anions spontaneously intercalated into the A-site plane of  $\text{Ti}_3\text{C}_2$  and bonded with specific site of  $\text{Ti}_3\text{C}_2$  to form more stable F-terminated  $\text{Ti}_3\text{C}_2\text{T}_z$ .

### Step 2

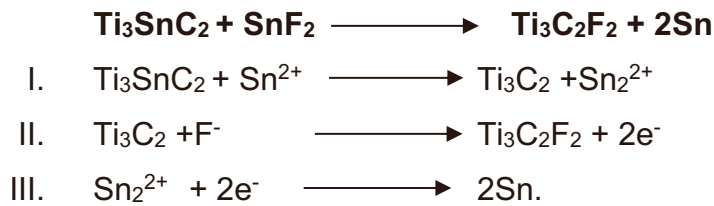

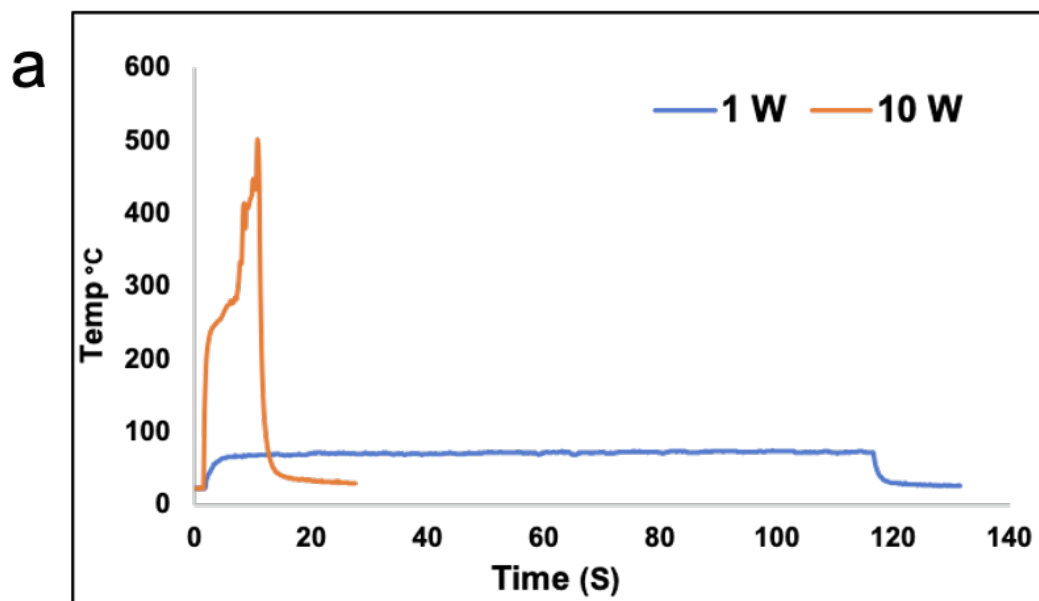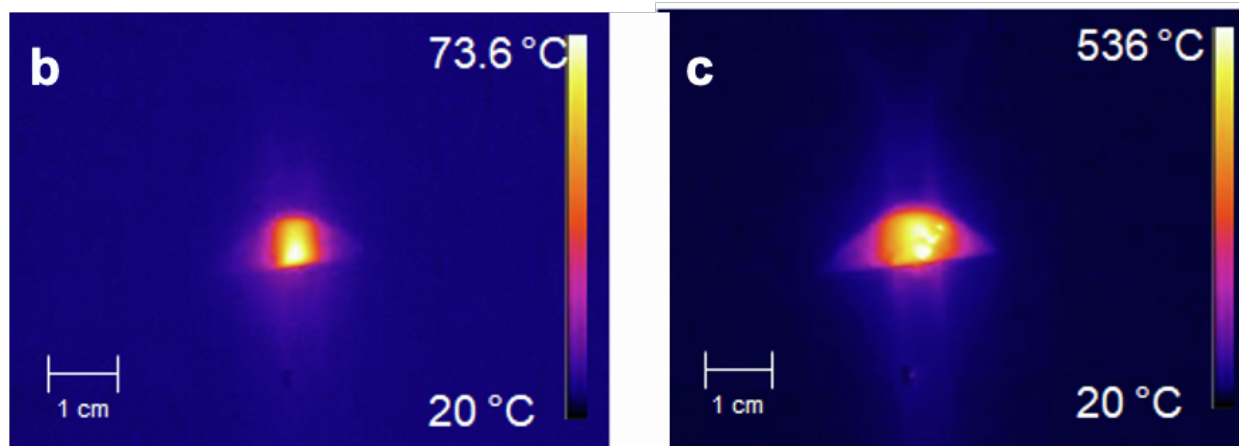

**Fig. S8.** a) Radio Frequency (RF) response of  $\text{Ti}_3\text{C}_2\text{T}_z$  at 1 W (135 MHz) and 10 W (135 MHz) power; b) Thermal Images of RF response of  $\text{Ti}_3\text{C}_2\text{T}_z$  at 1 W (135 MHz) and; c) 10 W (135 MHz) power. Related to STAR Methods.

## References:

LI, M., LU, J., LUO, K., LI, Y., CHANG, K., CHEN, K., ZHOU, J., ROSEN, J., HULTMAN, L., EKLUND, P., PERSSON, P. O. Å., DU, S., CHAI, Z., HUANG, Z. & HUANG, Q. 2019. Element Replacement Approach by Reaction with Lewis Acidic Molten Salts to Synthesize Nanolaminated MAX Phases and MXenes. *Journal of the American Chemical Society*, 141, 4730-4737.
